# Supplementary material
Source: HighWire-hosted journal article supplement (https://www.cmaj.ca/highwire/filestream/81430/field_highwire_adjunct_files/0/211416-res-1-at.pdf)
Supplement: 211416-res-1-at.pdf [file 211416-res-1-at.pdf]

## Appendix 1: Search Strategies

The following electronic databases were searched: MEDLINE (via Ovid), EconLit (via Proquest), Science Citation Index Expanded (SCI-EXPANDED, SSCI), Arts & Humanities Citation Index (A&HCI), Emerging Sources Citation (ESCI) and Conference Proceedings Citation Index (CPCI) (via Web of Science) Cochrane Library (via Wiley). The full strategies for each are below.

### Dates

- Initial Database search: January 1<sup>st</sup>, 2007 – May 28<sup>th</sup>, 2018
- 2<sup>nd</sup> Database search: June 1<sup>st</sup>, 2018-September 1<sup>st</sup>, 2019
- Grey Literature search: January 1<sup>st</sup>, 2007 – July 12<sup>th</sup>, 2019
- Retrospective Database search (for additional search terms found in grey lit): January 1<sup>st</sup>, 2007- September 1<sup>st</sup>, 2019
- Update Database and Grey Literature Search: September 1<sup>st</sup>, 2019-July 20<sup>th</sup>, 2020

### **Medline Search:**

Database: Ovid MEDLINE(R)

Search Strategy:

- 
- 1 Health services research/ (35933)
  - 2 Health care reform/ (32167)
  - 3 "Health services needs and demand"/ (51771)
  - 4 Comparative effectiveness research/ (3332)
  - 5 Practice Patterns, Physicians'/sn (16907)
  - 6 unnecessary procedures/ (5532)
  - 7 health services misuse/ (4267)
  - 8 medical overuse/ (1247)
  - 9 Potentially Inappropriate Medication List/ (343)
  - 10 Inappropriate Prescribing/ (2857)
  - 11 Quality Assurance, Health Care/ (55270)
  - 12 guidelines as topic/ or practice guidelines as topic/ (151252)
  - 13 "Quality of Health Care"/ (70701)
  - 14 (quality adj2 indicat\*).tw. (11169)
  - 15 Delivery of Health Care/ (86771)
  - 16 Guideline Adherence/ (30709)
  - 17 Critical Pathways/ (6433)
  - 18 exp Decision Theory/ or Decision Trees/ or exp Decision Support Techniques/ (85530)
  - 19 ((clinical or diagnostic or practice or practice or physician) adj3 decision\* adj3 (rule or tool or tools or pathway\* or support\* or model or models or system or systems)).ti,ab. (7491)
  - 20 ((CDST or CDSTs) and decision).ti,ab. (24)

- 21 ((pathway? or protocol? or algorithm?) adj2 (clinical or treatment? or diagnos\* or management or infection? or infectious? or antibiotic?)).ti,ab. (62893)
- 22 critical pathway\*.ti. (410)
- 23 inappropriate.ti,ab,kf. (57758)
- 24 (quality adj2 (improv\$ or manag\$ or care or healthcare)).ti,ab. (166438)
- 25 ((inappropriate or appropriate or overuse or overused or over-used or over-use) adj2 (care or approach or health care or healthcare or treat\* or therap\*)).ti,ab. (63217)
- 26 or/1-25 (856171)
- 27 (canadian\* or canada\* or british columbia\* or alberta\* or saskatchewan\* or manitoba\* or ontario\* or quebec\* or new brunswick\* or prince edward island\* or nova scotia\* or labrador\* or newfoundland\* or nunavut\* or northwest territor\* or yukon\* or toronto\* or montreal\* or vancouver\* or ottawa\* or calgary\* or edmonton\* or winnipeg\* or first nation\* or metis).jw,ti,ab,hw,ot,kf. (416323)
- 28 ((indigenous or aborig\*) adj2 (people or person\*)).ti,ab,kf. (3312)
- 29 exp Canada/ (152955)
- 30 or/27-29 (418991)
- 31 26 and 30 (29559)
- 32 limit 31 to dt=20190901-20201231 (809)

### Web of Knowledge:

- # 4 1,743 (#3 AND #2 AND #1) AND DOCUMENT TYPES: (Article OR Abstract of Published Item OR Bibliography OR Book Chapter OR Book Review OR Correction OR Correction, Addition OR Data Paper OR Discussion OR Editorial Material OR Meeting Abstract OR Meeting Summary OR Proceedings Paper OR Retracted Publication OR Retraction OR Review)  
*Indexes=SCI-EXPANDED, SSCI, CPCI-S, CPCI-SSH, ESCI*  
*Timespan=2007-2018*
- # 3 657,715 TS=(canadian\* or canada\* or british columbia\* or alberta\* or saskatchewan\* or manitoba\* or ontario\* or quebec\* or new brunswick\* or prince edward island\* or nova scotia\* or labrador\* or newfoundland\* or nunavut\* or northwest territor\* or yukon\* or toronto\* or montreal\* or vancouver\* or ottawa\* or calgary\* or edmonton\* or winnipeg\* or first nation\* or metis or indigen\* or aborigin\*)  
*Indexes=SCI-EXPANDED, SSCI, A&HCI, CPCI-S, CPCI-SSH, ESCI*  
*Timespan=All years*
- # 2 265,189 TS=(guideline adherence OR critical pathway\* OR clinical pathway OR critical pathway OR inappropriate OR over-use OR overuse)  
*Indexes=SCI-EXPANDED, SSCI, A&HCI, CPCI-S, CPCI-SSH, ESCI*  
*Timespan=All years*
- # 1 1,068,000 TS=(health services OR health care OR comparative effectiveness OR guidelines)  
*Indexes=SCI-EXPANDED, SSCI, A&HCI, CPCI-S, CPCI-SSH, ESCI*  
*Timespan=All years*

## Cochrane Library

- ID Search
- #1 MeSH descriptor: [Health Services Research] explode all trees
  - #2 MeSH descriptor: [Health Care Reform] explode all trees
  - #3 MeSH descriptor: [Health Services Needs and Demand] explode all trees
  - #4 MeSH descriptor: [Comparative Effectiveness Research] explode all trees
  - #5 MeSH descriptor: [Inappropriate Prescribing] explode all trees
  - #6 MeSH descriptor: [Guidelines as Topic] explode all trees
  - #7 MeSH descriptor: [Practice Guidelines as Topic] explode all trees
  - #8 MeSH descriptor: [Quality of Health Care] explode all trees
  - #9 (quality near indicat\*):ti,ab
  - #10 MeSH descriptor: [Delivery of Health Care] explode all trees
  - #11 #1 or #2 #3 or #4 or #5 or #6 or #7 or #8 or #9 or #10
  - #12 MeSH descriptor: [Guideline Adherence] explode all trees
  - #13 MeSH descriptor: [Critical Pathways] explode all trees
  - #14 MeSH descriptor: [Decision Theory] explode all trees
  - #15 MeSH descriptor: [Decision Trees] explode all trees
  - #16 MeSH descriptor: [Decision Support Techniques] explode all trees
  - #17 ((clinical or diagnostic or practice or practice or physician) and decision\* near (rule or tool or tools or pathway\* or support\* or model or models or system or systems)):ti,ab
  - #18 ((CDST or CDSTs) and decision):ti,ab
  - #19 ((pathway\* or protocol\* or algorithm\*) near (clinical or treatment\* or diagnos\* or management or infection\* or infectious\* or antibiotic\*)):ti,ab
  - #20 critical pathway:ti
  - #21 inappropriate:ti,ab
  - #22 (quality near (improv\* or manag\* or care or healthcare)):ti,ab
  - #23 ((inappropriate or appropriate or overuse or overused or over-used or over-use) near (care or approach or health care or healthcare or treat\* or therap\*)):ti,ab
  - #24 #12 or #13 or #14 or #15 or #16 or #17 or #18 or #19 or #20 or #21 or #22 or #23
  - #25 (canadian\* or canada\* or british columbia\* or alberta\* or saskatchewan\* or manitoba\* or ontario\* or quebec\* or new brunswick\* or prince edward island\* or nova scotia\* or labrador\* or newfoundland\* or nunavut\* or northwest territor\* or yukon\* or toronto\* or montreal\* or vancouver\* or ottawa\* or calgary\* or edmonton\* or winnipeg\* or first nation\* or metis or indigen\* or aborigin\*):ti,ab
  - #26 MeSH descriptor: [Canada] explode all trees
  - #27 #25 or #26
  - #28 #11 and #24 and #27 Publication Year from 2007 to 2018

## **EconLit via Proquest**

("health service" OR "prescrib\*" OR "quality assurance" OR "health care" OR "guideline\*" OR healthcare OR "deprescribe\* or pathway") AND (canadian\* OR canada\* OR british columbia\* OR alberta\* OR saskatchewan\* OR manitoba\* OR ontario\* OR quebec\* OR new brunswick\* OR prince edward island\* OR nova scotia\* OR labrador\* OR newfoundland\* OR nunavut\* OR northwest territor\* OR yukon\* OR toronto\* OR montreal\* OR vancouver\* OR ottawa\* OR calgary\* OR edmonton\* OR winnipeg\* OR first nation\* OR metis OR indigen\* OR aborigin\*)

Limits: 2007-2018

Peer reviewed.

## Key websites and sources of grey literature searched

Health Systems Evidence

<http://www.mcmasterhealthforum.org/hse/>

McMaster University . Centre for Health Economics and Policy Analysis. (CHEPA)

<http://www.chepa.org/research-products>

Canadian Institute for Health Information (CIHI)

<http://www.cihi.ca/>

Canadian Policy Research Networks . Health and Healthcare Human Resources (CPRN)

<http://www.cprn.org/theme.cfm?theme=131&l=en>

Ontario Ministry of Health and Long-Term Care . Ontario Case Costing Initiative (OCCI)

<http://www.occp.com/mainPage.htm>

CHSRF/CIHR Chair on Knowledge Transfer and Innovation . Knowledge Utilization -  
Utilisation des Connaissances (KUUC)

<http://kuuc.chair.ulaval.ca/english/index.ph>

International Society for Pharmacoeconomics and Outcomes Research . Value in Health: Journal  
of the International Society for Pharmacoeconomics and Outcomes Research(ISPOR)

<http://www.valueinhealthjournal.com/issues>

Center for the Evaluation of Value & Risk in Health. Tufts - New England Medical Center .  
Cost-Effectiveness Analysis Registry (CEA)

<https://research.tufts-nemc.org/cear/default.aspx>

The Dartmouth Institute for Health Policy and Clinical Practice (TDI).

<http://www.dartmouthatlas.org/>

WHO . Tables of Costs and Prices used in WHO-CHOICE Analysis (CHOICE (CHOosing  
Interventions that are Cost-Effective))

<http://www.who.int/choice/description/en/>

OECD . Health

[http://www.oecd.org/topic/0,2686,en\\_2649\\_37407\\_1\\_1\\_1\\_1\\_37407,00.html](http://www.oecd.org/topic/0,2686,en_2649_37407_1_1_1_1_37407,00.html)

Agency for Healthcare Research and Quality - Medical Expenditure Panel Survey MEPSnet

[http://www.meps.ahrq.gov/mepsweb/data\\_stats/MEPSnetHC.jsp](http://www.meps.ahrq.gov/mepsweb/data_stats/MEPSnetHC.jsp)

Agency for Healthcare Research and Quality - National Quality Measures Clearinghouse .

<http://www.qualitymeasures.ahrq.gov/>

Clearinghouse NQM. Validity of Clinical Quality Measures. May 29, 2014 2014.  
<http://www.qualitymeasures.ahrq.gov/tutorial/validity.aspx>.

Forum MH. Health Systems Evidence. <http://www.mcmasterhealthforum.org/hse/2015>).

(CHEPA) CfHEaPA. Hamilton: McMaster University; 1992-2014.

IDEAS

<https://ideas.repec.org/>

Information CIHI. Canadian Institute for Health Information. 1996-2014.  
<http://www.cihi.ca/CIHI-ext-portal/internet/EN/Home/home/cihi0000012015>).

Networks CPR. CPRN Health and Health Human Resources. 2009 2009.  
<http://www.cprn.org/theme.cfm?theme=131&l=en>.

Care OMoHaL-T. Ontario Case Costing Initiative. April 2013.  
<http://www.occp.com/mainPage.htm>.

sante QFdlre. Quebec Population Health Research Network (QPHRN).  
<http://kuuc.chair.ulaval.ca/english/index.ph>.

ISPOR. International Society for Pharmacoeconomics and Outcomes Research . Value in Health:  
Journal of the International Society for Pharmacoeconomics and Outcomes Research (ISPOR).  
2010-2015 ed; 2010-2015.

Health CftEoVRi. Cost-Effectiveness Analysis Registry (CEA). Tufts - New England Medical  
Center Tufts Medical Center; 2007-2013.

Practice TDIfHPaC. The Dartmouth Atlas of Health Care. 2015. <http://www.dartmouthatlas.org/>.

Organization WH. Cost effectiveness and strategic planning (WHO-CHOICE). 2015.  
<http://www.who.int/choice/description/en/>
